# Supplementary material for: Metal salts and complexes of 1,1′-dinitramino-5,5′-bitetrazole
Source: Royal Society of Chemistry journal article supplement (doi:10.1039/c7dt00536a), 2017-01-01
Supplement: c7dt00536a1.pdf [file c7dt00536a1.pdf]

Supplementary Information

**Metal Salts and Complexes of 1,1'-Dinitramino-5,5'-bitetrazole**

Maximilian Born,<sup>[a]</sup> Marc F. Bölter,<sup>[a]</sup> Thomas M. Klapötke,<sup>[a]</sup> Jörg Stierstorfer\*<sup>[a]</sup> and Norbert Szimhardt<sup>[a]</sup>

**Index**

|                                        |          |
|----------------------------------------|----------|
| <b>1. X-ray Diffraction</b>            | <b>1</b> |
| <b>2. Experimental Part</b>            | <b>6</b> |
| <b>3. IR spectroscopy of 7a and 7b</b> | <b>7</b> |
| <b>4. References</b>                   | <b>8</b> |

**1. X-ray Diffraction**

For all compounds (except for **4**, **15** and **16**), an Oxford Xcalibur3 diffractometer with a CCD area detector was employed for data collection using Mo- $K\alpha$  radiation ( $\lambda = 0.71073 \text{ \AA}$ ). By using the CRYCALISPRO software<sup>[S2]</sup> the data collection and reduction were performed. The structures were solved by direct methods (SIR-92,<sup>[S3]</sup> SIR-97<sup>[S4]</sup> or SHELXS-97<sup>[S5]</sup>) and refined by full-matrix least-squares on  $F^2$  (SHELXL<sup>[S5]</sup>) and finally checked using the PLATON software<sup>[S6]</sup> integrated in the WinGX software suite. The non-hydrogen atoms were refined anisotropically and the hydrogen atoms were located and freely refined. The absorptions were corrected by a SCALE3 ABSPACK multiscan method.<sup>[S7]</sup> All DIAMOND2 plots are shown with thermal ellipsoids at the 50% probability level and hydrogen atoms are shown as small spheres of arbitrary radii. The crystal structures of compounds **4**, **15** and **16** were determined at 100 K on a Bruker D8 Venture TXS diffractometer equipped with a multilayer monochromator, a Photon 2 detector, and a rotating-anode generator (Mo $K\alpha$  radiation). The SADABS program embedded in the Bruker APEX3 software has been used for multi-scan absorption corrections in all structures.<sup>[S8]</sup>

[a] Maximilian Born, Marc F. Bölter, Prof. Dr. Thomas M. Klapötke, Dr. Jörg Stierstorfer and Norbert Szimhardt  
Department of Chemistry, Ludwig Maximilian University of Munich, Butenandtstr.  
5-13, D-81377 Munich, Germany  
Fax: +49-89-2180-77492  
E-mail: tmk@cup.uni-muenchen.de, jstch@cup.uni-muenchen.de  
Homepage: <http://www.hedm.cup.uni-muenchen.de/>

**Table S1.** Crystallographic data and refinement parameters of compound **2**, **6**, **7a** and **7b**.

|                                            | <b>2</b>                                                     | <b>6</b>                                        | <b>7a</b>                                                                    | <b>7b</b>                                                                    |
|--------------------------------------------|--------------------------------------------------------------|-------------------------------------------------|------------------------------------------------------------------------------|------------------------------------------------------------------------------|
| Formula                                    | C <sub>6</sub> H <sub>8</sub> N <sub>10</sub> O <sub>4</sub> | CH <sub>2</sub> LiN <sub>4</sub> O <sub>4</sub> | C <sub>2</sub> H <sub>4</sub> N <sub>12</sub> Na <sub>2</sub> O <sub>6</sub> | C <sub>2</sub> H <sub>4</sub> N <sub>12</sub> Na <sub>2</sub> O <sub>6</sub> |
| FW [g mol <sup>-1</sup> ]                  | 284.22                                                       | 306.06                                          | 338.08                                                                       | 338.08                                                                       |
| Crystal system                             | Triclinic                                                    | Monoclinic                                      | Monoclinic                                                                   | Orthorhombic                                                                 |
| Space Group                                | <i>P</i> -1 (No. 2)                                          | <i>P</i> 2 <sub>1</sub> / <i>c</i> (No. 14)     | <i>P</i> 2 <sub>1</sub> / <i>c</i> (No. 14)                                  | <i>Pbca</i> (No. 61)                                                         |
| Color / Habit                              | Colorless block                                              | Colorless block                                 | Colorless block                                                              | Colorless block                                                              |
| Size [mm]                                  | 0.01 x 0.03 x 0.10                                           | 0.15 x 0.34 x 0.39                              | 0.08 x 0.15 x 0.28                                                           | 0.29 x 0.45 x 0.56                                                           |
| <i>a</i> [Å]                               | 4.1866(7)                                                    | 8.2760(9)                                       | 8.8347(5)                                                                    | 6.2136(3)                                                                    |
| <i>b</i> [Å]                               | 7.2348(10)                                                   | 10.8140(8)                                      | 9.4711(5)                                                                    | 10.9858(6)                                                                   |
| <i>c</i> [Å]                               | 10.3368(13)                                                  | 6.0650(4)                                       | 7.2402(4)                                                                    | 16.9609(8)                                                                   |
| $\alpha$ [°]                               | 81.092(5)                                                    | 90                                              | 90                                                                           | 90                                                                           |
| $\beta$ [°]                                | 83.309(6)                                                    | 106.073(10)                                     | 105.804(5)                                                                   | 90                                                                           |
| $\gamma$ [°]                               | 75.044(6)                                                    | 90                                              | 90                                                                           | 90                                                                           |
| <i>V</i> [Å <sup>3</sup> ]                 | 297.88(8)                                                    | 521.58(8)                                       | 582.92(6)                                                                    | 1157.77(10)                                                                  |
| <i>Z</i>                                   | 1                                                            | 2                                               | 2                                                                            | 4                                                                            |
| $\rho_{\text{calc}}$ [g cm <sup>-3</sup> ] | 1.584                                                        | 1.949                                           | 1.927                                                                        | 1.940                                                                        |
| $\mu$ [mm <sup>-1</sup> ]                  | 0.134                                                        | 0.176                                           | 0.236                                                                        | 0.238                                                                        |
| <i>F</i> (000)                             | 146                                                          | 308                                             | 340                                                                          | 680                                                                          |
| $\lambda_{\text{MoK}\alpha}$ [Å]           | 0.71073                                                      | 0.71073                                         | 0.71073                                                                      | 0.71073                                                                      |
| T [K]                                      | 173                                                          | 173                                             | 173                                                                          | 123                                                                          |
| $\theta$ min-max [°]                       | 3.3, 26.0                                                    | 4.2, 26.7                                       | 4.3, 26.0                                                                    | 4.4, 26.0                                                                    |
| Dataset h; k; l                            | -5:4; -8:8; -12:12                                           | -5:10; -13:13; -7:7                             | -10:10; -11:11; -6:8                                                         | -7:6; -13:13; -20:20                                                         |
| Reflect. coll.                             | 3156                                                         | 3905                                            | 2933                                                                         | 8554                                                                         |
| Independ. refl.                            | 1159                                                         | 1105                                            | 1136                                                                         | 1132                                                                         |
| <i>R</i> <sub>int</sub>                    | 0.039                                                        | 0.032                                           | 0.027                                                                        | 0.022                                                                        |
| Reflection obs.                            | 880                                                          | 893                                             | 956                                                                          | 1059                                                                         |
| No. parameters                             | 96                                                           | 108                                             | 108                                                                          | 108                                                                          |
| <i>R</i> <sub>1</sub> (obs)                | 0.0481                                                       | 0.0334                                          | 0.0305                                                                       | 0.0277                                                                       |
| <i>wR</i> <sub>2</sub> (all data)          | 0.1184                                                       | 0.0805                                          | 0.0812                                                                       | 0.0791                                                                       |
| <i>S</i>                                   | 1.08                                                         | 1.08                                            | 1.11                                                                         | 1.09                                                                         |
| Resd. Dens. [e Å <sup>-3</sup> ]           | -0.22, 0.22                                                  | -0.28, 0.26                                     | -0.26, 0.26                                                                  | -0.21, 0.37                                                                  |
| Device type                                | Bruker D8 Venture<br>rotating anode                          | Oxford XCalibur3<br>CCD                         | Oxford XCalibur3<br>CCD                                                      | Oxford XCalibur3<br>CCD                                                      |
| Solution                                   | SIR-92                                                       | SIR-92                                          | SIR-92                                                                       | SHELXS-97                                                                    |
| Refinement                                 | SHELXL-97                                                    | SHELXL-97                                       | SHELXL-97                                                                    | SHELXL-97                                                                    |
| Absorpt. corr.                             | multi-scan                                                   | multi-scan                                      | multi-scan                                                                   | multi-scan                                                                   |
| CCDC                                       | 1502966                                                      | 1500005                                         | 1500002                                                                      | 1500003                                                                      |

**Table S2.** Crystallographic data and refinement parameters of compound **8–11**.

|                                            | <b>8</b>                                                      | <b>9</b>                                                      | <b>10</b>                                                     | <b>11</b>                                                        |
|--------------------------------------------|---------------------------------------------------------------|---------------------------------------------------------------|---------------------------------------------------------------|------------------------------------------------------------------|
| Formula                                    | C <sub>2</sub> N <sub>12</sub> O <sub>4</sub> Rb <sub>2</sub> | C <sub>2</sub> N <sub>12</sub> O <sub>4</sub> Cs <sub>2</sub> | C <sub>2</sub> Ag <sub>2</sub> N <sub>12</sub> O <sub>4</sub> | C <sub>2</sub> H <sub>18</sub> N <sub>18</sub> O <sub>4</sub> Ni |
| FW [g mol <sup>-1</sup> ]                  | 427.08                                                        | 521.96                                                        | 471.88                                                        | 417.05                                                           |
| Crystal system                             | Triclinic                                                     | Monoclinic                                                    | Monoclinic                                                    | Monoclinic                                                       |
| Space Group                                | <i>P</i> -1 (No. 2)                                           | <i>P</i> 2 <sub>1</sub> / <i>c</i> (No. 14)                   | <i>P</i> 2/ <i>c</i> (No. 13)                                 | <i>P</i> 2 <sub>1</sub> / <i>c</i> (No. 14)                      |
| Color / Habit                              | Colorless needle                                              | Colorless needle                                              | Colorless plate                                               | Purple cylinder                                                  |
| Size [mm]                                  | 0.03 x 0.05 x 0.44                                            | 0.04 x 0.09 x 0.37                                            | 0.02 x 0.10 x 0.12                                            | 0.09 x 0.13 x 0.26                                               |
| <i>a</i> [Å]                               | 5.3034(5)                                                     | 5.5885(2)                                                     | 6.7520(4)                                                     | 13.5062(12)                                                      |
| <i>b</i> [Å]                               | 7.0632(6)                                                     | 12.4847(4)                                                    | 5.0649(4)                                                     | 11.5426(8)                                                       |
| <i>c</i> [Å]                               | 8.5675(7)                                                     | 8.7893(3)                                                     | 14.1529(9)                                                    | 10.4455(7)                                                       |
| $\alpha$ [°]                               | 66.821(8)                                                     | 90                                                            | 90                                                            | 90                                                               |
| $\beta$ [°]                                | 86.667(7)                                                     | 92.250(3)                                                     | 92.180(6)                                                     | 95.176(7)                                                        |
| $\gamma$ [°]                               | 70.964(8)                                                     | 90                                                            | 90                                                            | 90                                                               |
| <i>V</i> [Å <sup>3</sup> ]                 | 277.98(5)                                                     | 612.76(4)                                                     | 483.65(6)                                                     | 1621.8(2)                                                        |
| <i>Z</i>                                   | 1                                                             | 2                                                             | 2                                                             | 4                                                                |
| $\rho_{\text{calc}}$ [g cm <sup>-3</sup> ] | 2.551                                                         | 2.829                                                         | 3.240                                                         | 1.708                                                            |
| $\mu$ [mm <sup>-1</sup> ]                  | 8.845                                                         | 5.989                                                         | 4.097                                                         | 1.255                                                            |
| <i>F</i> (000)                             | 202                                                           | 476                                                           | 444                                                           | 864                                                              |
| $\lambda_{\text{MoK}\alpha}$ [Å]           | 0.71073                                                       | 0.71073                                                       | 0.71073                                                       | 0.71073                                                          |
| T [K]                                      | 173                                                           | 173                                                           | 173                                                           | 173                                                              |
| $\vartheta$ min-max [°]                    | 4.3, 26.0                                                     | 4.6, 26.0                                                     | 4.3, 26.0                                                     | 4.1, 25.0                                                        |
| Dataset <i>h</i> ; <i>k</i> ; <i>l</i>     | -6:6; -8:8; -10:10                                            | -6:6; -15:15; -10:10                                          | -7:8; -5:6; -17:17                                            | -10:16; -13:13; -12: 12                                          |
| Reflect. coll.                             | 3969                                                          | 8446                                                          | 2377                                                          | 7466                                                             |
| Independ. refl.                            | 1096                                                          | 1195                                                          | 955                                                           | 2837                                                             |
| <i>R</i> <sub>int</sub>                    | 0.041                                                         | 0.034                                                         | 0.029                                                         | 0.063                                                            |
| Reflection obs.                            | 1000                                                          | 1061                                                          | 761                                                           | 1838                                                             |
| No. parameters                             | 91                                                            | 91                                                            | 93                                                            | 232                                                              |
| <i>R</i> <sub>1</sub> (obs)                | 0.0242                                                        | 0.0172                                                        | 0.0333                                                        | 0.0503                                                           |
| w <i>R</i> <sub>2</sub> (all data)         | 0.0509                                                        | 0.0386                                                        | 0.0779                                                        | 0.0992                                                           |
| <i>S</i>                                   | 1.04                                                          | 1.08                                                          | 1.05                                                          | 0.97                                                             |
| Resd. Dens.[e Å <sup>-3</sup> ]            | -0.47, 0.49                                                   | -0.37, 0.77                                                   | -1.43, 0.85                                                   | -0.53, 0.81                                                      |
| Device type                                | Oxford XCalibur3                                              | Oxford XCalibur3                                              | Oxford XCalibur3                                              | Bruker D8 Venture                                                |
|                                            | CCD                                                           | CCD                                                           | CCD                                                           | rotating anode                                                   |
| Solution                                   | SIR-92                                                        | SIR-92                                                        | SHELXS-97                                                     | SHELXS-97                                                        |
| Refinement                                 | SHELXL-97                                                     | SHELXL-97                                                     | SHELXL-97                                                     | SHELXL-97                                                        |
| Absorpt. corr.                             | multi-scan                                                    | multi-scan                                                    | multi-scan                                                    | multi-scan                                                       |
| CCDC                                       | 1500001                                                       | 1500004                                                       | 1524647                                                       | 1524646                                                          |

**Table S3.** Crystallographic data and refinement parameters of compound **12**, **13**, **15** and **16**.

|                                            | <b>12</b>                                                       | <b>13</b>                                                        | <b>15</b>                                                       | <b>16</b>                                                         |
|--------------------------------------------|-----------------------------------------------------------------|------------------------------------------------------------------|-----------------------------------------------------------------|-------------------------------------------------------------------|
| Formula                                    | C <sub>2</sub> H <sub>14</sub> CuN <sub>16</sub> O <sub>5</sub> | C <sub>2</sub> H <sub>12</sub> N <sub>16</sub> O <sub>4</sub> Zn | C <sub>2</sub> H <sub>8</sub> N <sub>12</sub> O <sub>8</sub> Ba | C <sub>2</sub> H <sub>12</sub> N <sub>12</sub> O <sub>10</sub> Ba |
| FW [g mol <sup>-1</sup> ]                  | 405.83                                                          | 389.65                                                           | 415.82                                                          | 501.58                                                            |
| Crystal system                             | Monoclinic                                                      | Monoclinic                                                       | Monoclinic                                                      | Monoclinic                                                        |
| Space Group                                | <i>C2/c</i> (No. 15)                                            | <i>P2<sub>1</sub>/n</i> (No. 14)                                 | <i>P2<sub>1</sub>/c</i> (No. 14)                                | <i>P2<sub>1</sub>/n</i> (No. 14)                                  |
| Color / Habit                              | Blue block                                                      | Colorless block                                                  | Colorless block                                                 | Colorless block                                                   |
| Size [mm]                                  | 0.05 x 0.11 x 0.23                                              | 0.10 x 0.13 x 0.20                                               | 0.03 x 0.07 x 0.10                                              | 0.03 x 0.06 x 0.09                                                |
| <i>a</i> [Å]                               | 11.4131(5)                                                      | 10.2414(3)                                                       | 10.7948(3)                                                      | 8.9593(3)                                                         |
| <i>b</i> [Å]                               | 7.4648(3)                                                       | 10.6483(3)                                                       | 15.0619(4)                                                      | 9.5952(3)                                                         |
| <i>c</i> [Å]                               | 17.2079(8)                                                      | 13.1297(4)                                                       | 9.3539(2)                                                       | 17.9981(6)                                                        |
| $\alpha$ [°]                               | 90                                                              | 90                                                               | 90                                                              | 90                                                                |
| $\beta$ [°]                                | 98.739(5)                                                       | 94.149(3)                                                        | 110.333(1)                                                      | 92.798(1)                                                         |
| $\gamma$ [°]                               | 90                                                              | 90                                                               | 90                                                              | 90                                                                |
| <i>V</i> [Å <sup>3</sup> ]                 | 1449.03(11)                                                     | 1428.09(7)                                                       | 1426.09(6)                                                      | 1545.39(9)                                                        |
| <i>Z</i>                                   | 4                                                               | 4                                                                | 4                                                               | 4                                                                 |
| $\rho_{\text{calc}}$ [g cm <sup>-3</sup> ] | 1.860                                                           | 1.812                                                            | 1.937                                                           | 2.156                                                             |
| $\mu$ [mm <sup>-1</sup> ]                  | 1.570                                                           | 1.774                                                            | 3.849                                                           | 2.651                                                             |
| <i>F</i> (000)                             | 828                                                             | 792                                                              | 824                                                             | 976                                                               |
| $\lambda_{\text{MoK}\alpha}$ [Å]           | 0.71073                                                         | 0.71073                                                          | 0.71073                                                         | 0.71073                                                           |
| T [K]                                      | 123                                                             | 173                                                              | 100                                                             | 173                                                               |
| $\vartheta$ min-max [°]                    | 4.2, 26.0                                                       | 4.1, 26.0                                                        | 2.8, 27.5                                                       | 2.3, 26.0                                                         |
| Dataset <i>h</i> ; <i>k</i> ; <i>l</i>     | -13:14; -9:9; -21:21                                            | -12:12; -13:8; -16:14                                            | -14:14; -19:19; -12:12                                          | -11:11; -11:11; -22:22                                            |
| Reflect. coll.                             | 5250                                                            | 10947                                                            | 23112                                                           | 49826                                                             |
| Independ. refl.                            | 1422                                                            | 2785                                                             | 3271                                                            | 3024                                                              |
| <i>R</i> <sub>int</sub>                    | 0.040                                                           | 0.030                                                            | 0.029                                                           | 0.030                                                             |
| Reflection obs.                            | 1205                                                            | 2310                                                             | 2910                                                            | 2875                                                              |
| No. parameters                             | 117                                                             | 256                                                              | 240                                                             | 246                                                               |
| <i>R</i> <sub>1</sub> (obs)                | 0.0300                                                          | 0.0257                                                           | 0.0202                                                          | 0.0162                                                            |
| <i>wR</i> <sub>2</sub> (all data)          | 0.0695                                                          | 0.0675                                                           | 0.0501                                                          | 0.0868                                                            |
| <i>S</i>                                   | 1.08                                                            | 1.03                                                             | 1.07                                                            | 1.43                                                              |
| Resd. Dens. [e Å <sup>-3</sup> ]           | -0.31, 0.27                                                     | -0.37, 0.58                                                      | -0.29, 0.86                                                     | -1.12, 0.80                                                       |
| Device type                                | Oxford XCalibur3<br>CCD                                         | Oxford XCalibur3<br>CCD                                          | Oxford XCalibur3<br>CCD                                         | Oxford XCalibur3<br>CCD                                           |
| Solution                                   | SHELXS-97                                                       | SHELXS-97                                                        | SHELXS-97                                                       | SHELXS-97                                                         |
| Refinement                                 | SHELXL-97                                                       | SHELXL-97                                                        | SHELXL-97                                                       | SHELXL-97                                                         |
| Absorpt. corr.                             | multi-scan                                                      | multi-scan                                                       | multi-scan                                                      | multi-scan                                                        |
| CCDC                                       | 1502968                                                         | 1510459                                                          | 1510459                                                         | 1510459                                                           |

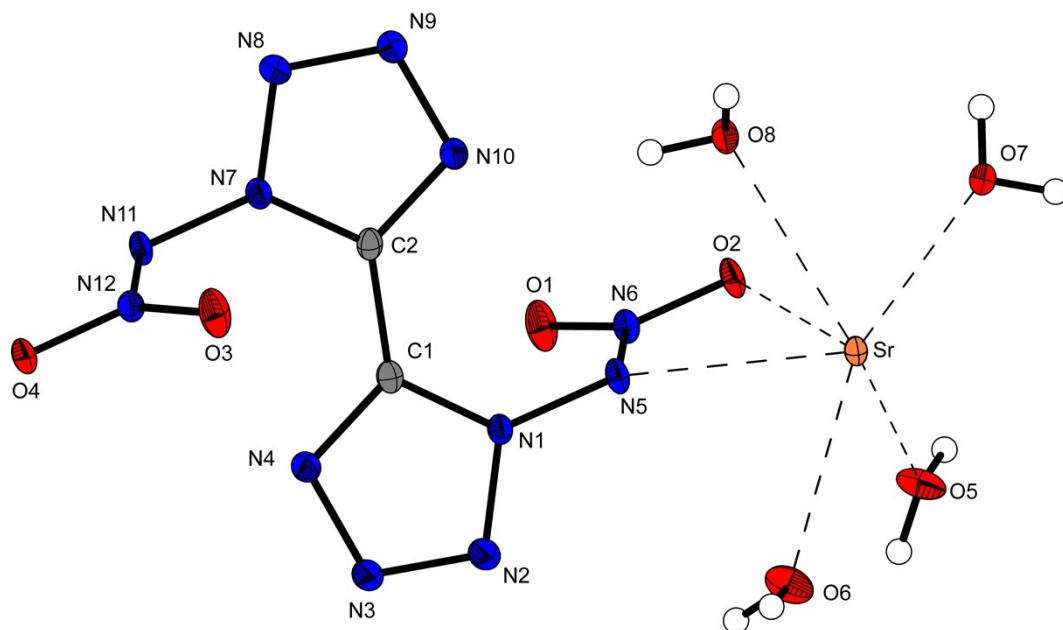

**Figure S1** Molecular structure of **15** showing the atom-labelling scheme. Thermal ellipsoids represent the 50% probability level.

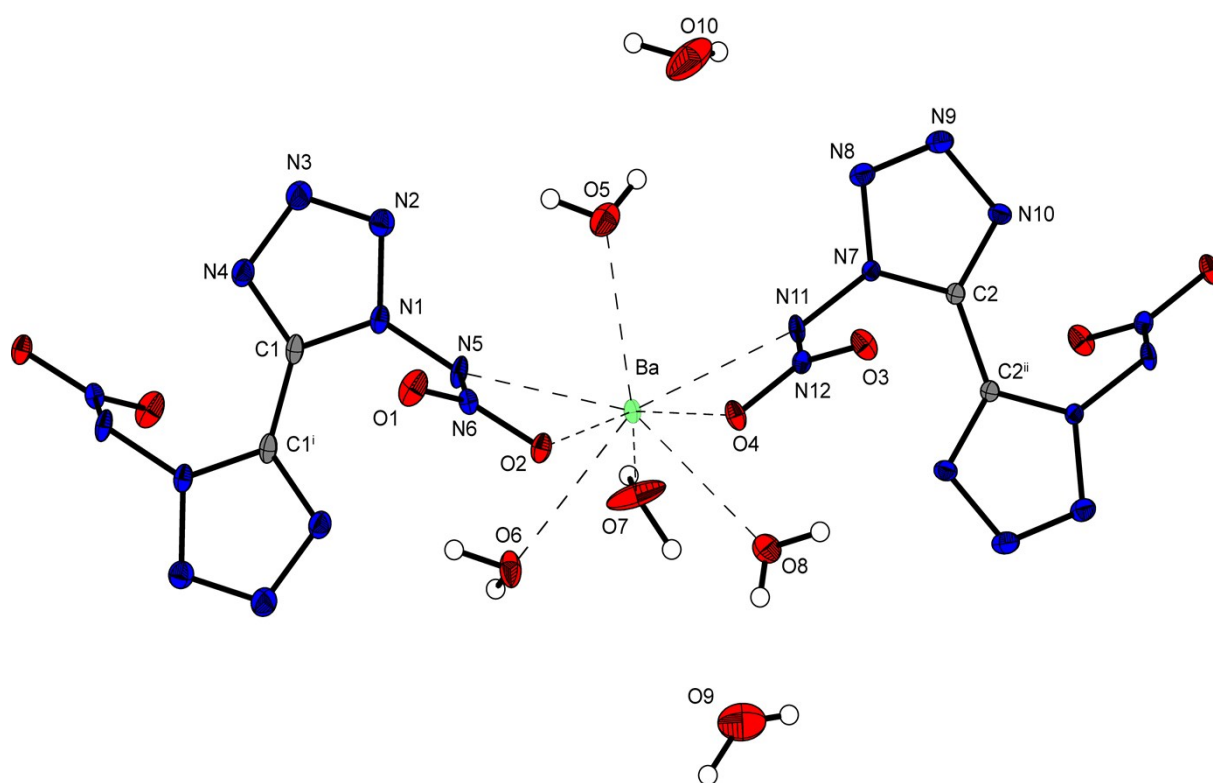

**Figure S2** Extended molecular structure of **16** showing the atom-labelling scheme. Thermal ellipsoids represent the 50% probability level. Symmetry codes: (i)  $-x, -y, 2-z$ ; (ii)  $1-x, -y, 1-z$ .

## 2. Experimental Part

### General Procedures

Differential Scanning Calorimetry (DSC) was performed on a LINSEIS DSC PT10 with about 1 mg substance in a perforated aluminum vessel with a heating rate of 5 K·min<sup>-1</sup> and a nitrogen flow of 5 dm<sup>3</sup>·h<sup>-1</sup>. Differential Thermal Analysis (DTA) measurements were carried out in glass tubes on an OZM DTA 552-Ex device with a heating rate of 5 K·min<sup>-1</sup>. Thermal gravimetric analysis (TGA) measurements were performed on a Perkin Elmer TGA4000 with a heating rate of 5 K min<sup>-1</sup> in Al<sub>2</sub>O<sub>3</sub> crucibles. The NMR spectra were recorded with a 400 MHz instrument (<sup>1</sup>H 399.8 MHz, <sup>13</sup>C 100.5 MHz, <sup>14</sup>N 28.9 MHz, and <sup>15</sup>N 40.6 MHz). Chemical shifts are given in parts per million relative to tetramethylsilane (<sup>1</sup>H, <sup>13</sup>C) and nitromethane (<sup>14</sup>N, <sup>15</sup>N). Infrared spectra were measured with a Perkin-Elmer Spectrum BX-FTIR spectrometer equipped with a Smiths DuraSampIR II ATR device. Transmittance values are qualitatively described as “very strong” (vs), “strong” (s), “medium” (m), and “weak” (w). Raman spectra were recorded using a Bruker MultiRAM FT-Raman instrument fitted with a liquid-nitrogen cooled germanium detector and a Nd:YAG laser ( $\lambda = 1064$  nm). The intensities are quoted as percentages of the most intense peak and are given in parentheses. Low-resolution mass spectra were recorded with a JEOL MStation JMS 700 (DEI+ / FAB+/-). Elemental analysis was carried out using a Vario Micro from the Elementar Company.

The impact sensitivity tests were carried out according to STANAG 4489<sup>[S9]</sup> modified instruction<sup>[S10]</sup> using a Bundesanstalt für Materialforschung (BAM) drophammer.<sup>[S11]</sup> The friction sensitivity tests were carried out according to STANAG 4487<sup>[S12]</sup> modified instruction<sup>[S13]</sup> using the BAM friction tester. The classification of the tested compounds results from the “UN Recommendations on the Transport of Dangerous Goods”.<sup>[S14]</sup> All compounds were tested upon the sensitivity toward electrical discharge using the Electric Spark Tester ESD 2010 EN.<sup>[S15]</sup>

### *1N,1N'*-Dimethylnitrocarbamate-5,5'-bitetrazole (**4**)

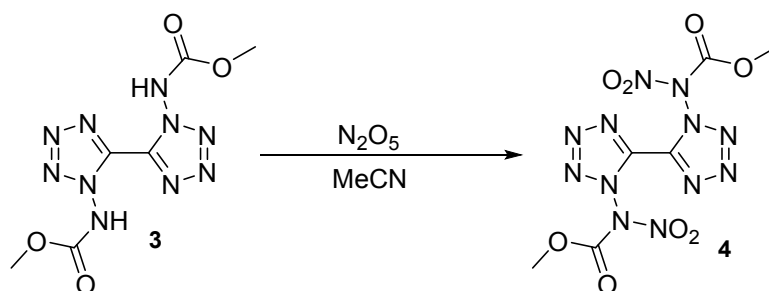

0.45 g (4.17 mmol) N<sub>2</sub>O<sub>5</sub> was dissolved in 50 mL MeCN at -5 °C and 0.3 g **3**<sup>[S1]</sup> (1.05 mmol) was added portion wise. The mixture was stirred for 2.5 h at -5 °C and finally quenched by adding the mixture to 50 g of ice-water. The precipitate was filtered off giving **4** (355 mg, 0.95 mmol, 90 %). **DTA** (5 °C min<sup>-1</sup>): 102 °C (dec.); **IR** (atr, cm<sup>-1</sup>)  $\tilde{\nu} = 3223$  (w), 2969 (w), 1794 (m), 1658 (m), 1438 (w), 1408 (w), 1322 (m), 1220 (s), 1180 (m), 1103 (w), 1041 (w), 990 (w), 936 (w), 864 (w), 818 (m), 769 (s), 732 (m), 666 (m), 590 (w); **<sup>1</sup>H NMR** (dms<sub>o</sub>-*d*<sub>6</sub>, 25 °C, ppm):  $\delta$ : 3.85 (s, 6H, CH<sub>3</sub>); **<sup>13</sup>C{<sup>1</sup>H} NMR** (dms<sub>o</sub>-*d*<sub>6</sub>, 25 °C, ppm)  $\delta$ : 48.7 (CH<sub>3</sub>), 124.3 (C<sub>Q</sub>), 141.0 (C=O); **<sup>14</sup>N NMR** (dms<sub>o</sub>-*d*<sub>6</sub>, 25 °C, ppm):  $\delta = -66$ ; **MS** *m/z* (FAB<sup>+</sup>): 375.4 (C<sub>6</sub>H<sub>7</sub>N<sub>12</sub>O<sub>8</sub><sup>+</sup>); **EA** (C<sub>6</sub>H<sub>6</sub>N<sub>12</sub>O<sub>8</sub>, 374.19): calc.: C 19.26, H 1.62; N 44.92; found: C 20.31, H 1.90, N 44.73 %; **BAM drophammer**: 1 J, **friction tester**: <5 N, **ESD**: 3 mJ.

### Diammonium 1,1'-dinitramino-5,5'-bitetrazolate (**5**)

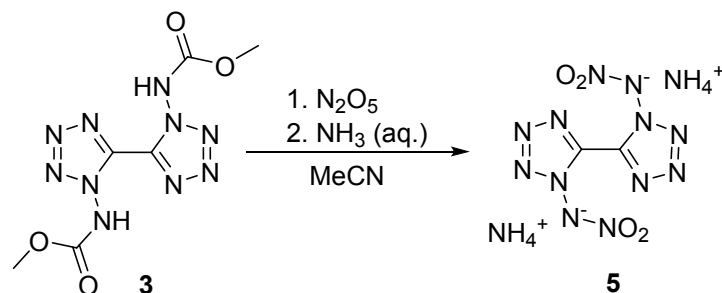

1.00 g (3.52 mmol) of **3**<sup>[S1]</sup> was suspended in 50 mL dry acetonitrile and cooled to  $-10^\circ\text{C}$ . 1.5 g of dinitrogen pentoxide (13.9 mmol) was added all at once and the reaction mixture was stirred for 2 h at the initial temperature. An excess of concentrated ammonia solution (3 mL) was added to the obtained solution and the suspension was stirred for 20 minutes. The pH-value was checked to be above 9 and the colorless precipitate was collected by suction filtration and washed with ice-cold water (1 mL) and ethanol to give **5** (0.89 g, 3.06 mmol, 87 %). **IR** (atr,  $\text{cm}^{-1}$ )  $\tilde{\nu}$  = 3177 (w), 3050 (w), 1395 (s), 1368 (s), 1280 (s), 1259 (s), 1179 (w), 1126 (m), 1036 (w), 1009 (w), 995 (w), 875 (s), 778 (m), 772 (w); **<sup>1</sup>H NMR** ( $\text{dms}\text{-}d_6$ , 25  $^\circ\text{C}$ , ppm):  $\delta$ : 7.07 (s, 8H,  $\text{NH}_4^+$ ); **<sup>13</sup>C{<sup>1</sup>H} NMR** ( $\text{dms}\text{-}d_6$ , 25  $^\circ\text{C}$ , ppm)  $\delta$ : 140.4 ( $\text{C}_Q$ ); **<sup>14</sup>N NMR** ( $\text{dms}\text{-}d_6$ , 25  $^\circ\text{C}$ , ppm):  $\delta$  =  $-359$ .

### 3. IR spectroscopy of **7a** and **7b**

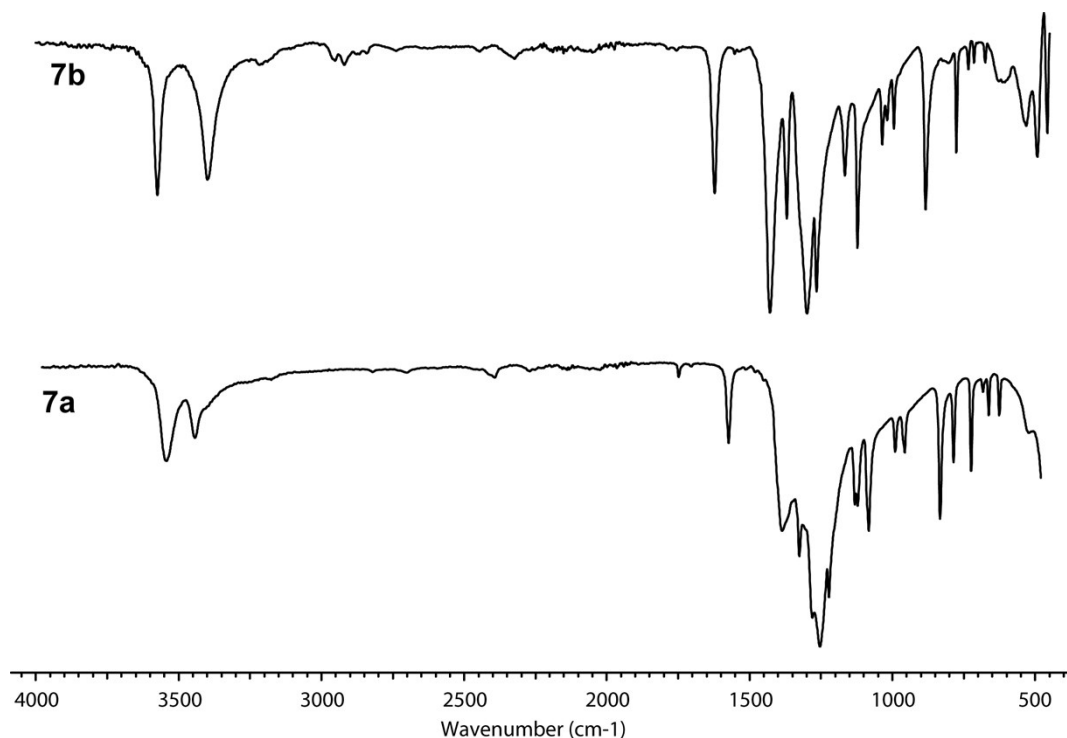

## 4. References

- [S1] D. Fischer, T. M. Klapötke, J. Stierstorfer, *Angew. Chem. Int. Ed.* **2014**, *53*, 8172–8175.
- [S2] *CrysAlisPro*, Oxford Diffraction Ltd., version 171.33.41, **2009**.
- [S3] *SIR-92, A program for crystal structure solution*: A. Altomare, G. Cascarano, C. Giacovazzo, A. Guagliardi, *J. Appl. Crystallogr.* **1993**, *26*, 343.
- [S4] a) A. Altomare, G. Cascarano, C. Giacovazzo, A. Guagliardi, A. G. G. Moliterni, M. C. Burla, G. Polidori, M. Camalli and R. Spagna, *SIR97*, 1997; b) A. Altomare, M. C. Burla, M. Camalli, G. L. Cascarano, C. Giacovazzo, A. Guagliardi, A. G. G. Moliterni, G. Polidori and R. Spagna, *J. Appl. Crystallogr.* 1999, **32**, 115.
- [S5] a) G. M. Sheldrick, *SHELX-97*, University of Göttingen, Göttingen, Germany, **1997**; b) G. M. Sheldrick, *Acta Crystallogr., Sect. A* 2008, **64**, 112.
- [S6] A. L. Spek, *PLATON, A Multipurpose Crystallographic Tool*, Utrecht University, The Netherlands, 1999.
- [S7] *SCALE3 ABSPACK – An Oxford Diffraction program* (1.0.4, gui: 1.0.3), Oxford Diffraction Ltd., 2005.
- [S8] *APEX3*. Bruker AXS Inc., Madison, Wisconsin, USA.
- [S9] NATO standardization agreement (STANAG) on explosives, *impact sensitivity tests*, no. 4489, 1st ed., Sept. 17, 1999.
- [S10] WIWEB-Standardarbeitsanweisung 4-5.1.02, Ermittlung der Explosionsgefährlichkeit, hier der Schlagempfindlichkeit mit dem Fallhammer, Nov. 8, 2002.
- [S11] <http://www.bam.de>
- [S12] NATO standardization agreement (STANAG) on explosive, *friction sensitivity tests*, no. 4487, 1st ed., Aug. 22, 2002.
- [S13] WIWEB-Standardarbeitsanweisung 4-5.1.03, Ermittlung der Explosionsgefährlichkeit oder der Reibeempfindlichkeit mit dem Reibeapparat, Nov. 8, 2002.
- [S14] Impact: insensitive > 40 J, less sensitive  $\geq$  35 J, sensitive  $\geq$  4 J, very sensitive  $\leq$  3 J; Friction: insensitive > 360 N, less sensitive = 360 N, sensitive < 360 N and > 80 N, very sensitive  $\leq$  80 N, extremely sensitive  $\leq$  10 N, According to: *Recommendations on the Transport of Dangerous Goods, Manual of Tests and Criteria*, 4th edition, United Nations, New York-Geneva, 1999.
- [S15] <http://www.ozm.cz>
